# Supplementary material for: The Effect of Simvastatin on Gut Microbiota and Lipid Metabolism in Hyperlipidemic Rats Induced by a High-Fat Diet
Source: Front Pharmacol. 2020 Apr 29;11:522. doi: 10.3389/fphar.2020.00522 (PMC7201051; doi:10.3389/fphar.2020.00522)
Supplement: Supplementary file 1 [file DataSheet_1.xls]

## Sheet: HFD-SIM网络图数据
OTU ID	taxonomy	NFD1_1	NFD1_2	NFD1_3	NFD1_4	NFD2_1	NFD2_3	NFD2_4	NFD2_5	HFD1_1	HFD1_2	HFD1_3	HFD1_5	HFD2_2	HFD2_3	HFD2_4	HFD2_5	SIM1_1	SIM1_2	SIM1_3	SIM1_4	SIM2_1	SIM2_2	SIM2_3	SIM2_4
	Body weight	386	398	430	445	423	418	456	435	424	395	489	402	472	446	475	386	457	423	441	436	496	489	441	484
	Liver index	2.32124	2.25126	2.82791	2.63596	2.63357	2.54785	2.4386	2.44598	2.50236	4.76278	4.11194	4.0876	3.70975	4.434	3.89238	3.75789	4.32385	3.8156	3.18821	3.77982	3.75254	3.45876	4.10231	3.08246
	Kindey index	0.725389	0.58794	0.702326	0.658427	0.744681	0.643541	0.686404	0.636782	0.714623	0.683027	0.704526	0.689716	0.622881	0.711409	0.630045	0.595789	0.628009	0	0.564626	0.580275	0.642432	0.621346	0.614512	0.57438
	Spleen index	0.173575	0.183417	0.255814	0.179775	0.179669	0.23445	0.236842	0.222989	0.242925	0.196319	0.231546	0.252462	0.230932	0.190157	0.201794	0.252632	0.299781	0.165485	0.131519	0.206422	0.145161	0.210634	0	0.167355
	Kindey fat index	0.772021	0.590452	0.588372	1.07191	0.460993	0.399522	0.653509	0.857471	1.40566	2.19427	1.70149	1.56824	1.76242	1.79246	1.36996	1.87368	1.60613	0.91253	1.33787	1.37844	1.3629	1.35163	1.04762	0
	Epididymis fat index	0.637306	0.746231	1.0907	1.58427	0.903073	0.638756	1.00219	1.10345	1.11792	2.02045	1.3806	1.42536	1.17797	1.15884	1.45067	1.13053	1.34573	1.25296	1.14966	0	1.02463	1.10001	1.00227	1.37603
	Serum TC	2.65526	2.78129	2.10683	2.07618	1.91267	2.55988	2.75745	2.16815	2.17496	3.88495	5.02268	4.06889	4.93411	3.84067	4.95795	4.31756	4.86598	2.7847	3.39103	3.44342	2.64844	3.75355	3.52047	3.29565
	Serum TG	0.730876	0.461387	0.528002	0.588561	0.506806	0.394771	0.422023	0.48561	0.35995	1.06698	1.15765	0.923152	1.25017	0.986739	1.47576	1.02762	0.859565	0.390229	0.614299	0.571908	0.461387	0.600673	0.70968	0.799005
	Serum NEFA	0.444808	0.204858	0.184658	0.483372	0.17364	0.420936	0.442972	0.521323	0.419711	0.782086	0.74291	0.925934	0.772292	1.2271	1.46643	1.45346	1.48275	1.47615		0.878188	0.985921	0.790655	0.606408	0.929606
	Hepatic TC	0.0531999	0.0535894	0.0648261	0.0589966	0.0556948	0.0706077	0.057742	0.0690227	0.0782864	0.382013	0.355117	0.464931	0.370907	0.314568		0.354045		0.244948	0.280635	0.334095	0.293241	0.334981	0.282459	0.455243
	Hepatic TG	0.131227	0.0995482	0.0967681	0.0879285	0.0694344	0.0999402	0.11729	0.0860126	0.163172	0.396908	0.313854	0.271165		0.404732	0.376009	0.240373	0.24895	0.252812	0.230022	0.268994	0.318759	0.227723	0.197221	0.294917
	Hepatic TBA	20.1893	45.8044	52.6183	28.5174	29.7792	24.7319	33.5647	42.1451	49.8423	52.3659	51.735	53.4655	49.7161	48.2019	53.2492	63.0915		35.3312	35.3312	48.7066	45.6782	45.6247	44.0532	46.6642
	Hepatic NEFA	46.7066	43.1029	28.6693	44.6929	42.568	48.2554	39.0688	32.1625	33.9407	109.23	100.145	108.136	151.828	143.907	113.215	99.3548	127.794	83.9796	74.1363	77.8464	91.6894		69.7226	85.9739
	Hepatic FAT	72.75	71.75	34.125	69.75	40	46.375	38.5	45.875		228.75	242.375	293.25	310.125	238.625	239.125	322.25	321.375	191.75	170.75	168.5		198.25	162	162.5
	Hepatic MDA	1.48883	1.27397	1.62247	1.44197	1.20412	1.52244	1.62493	1.60349	1.38564	2.10482	1.66891	2.64959	2.46705	2.47689	2.3953	1.99207	2.06498	1.22619	1.20961	1.22922	1.48344	1.26114	1.08984	1.5826
	Hepatic SOD	27.4145	27.962	27.2445	27.9494	27.9368	27.1942	28.1193	33.236	27.4019	31.4806	32.914	33.1808	32.3955	33.4172	34.1948	31.9609	32.5861	32.291	33.2684	30.3718	37.5063	30.8569	34.8917	33.3156
	Hepatic GSH-PX	74.2874	94.0262	77.755	83.0898	41.4782	84.2901	87.0909	78.822	66.0184	125.218	159.471	108.899	95.1658	100.821	99.5283	31.1834	105.83	92.7578	92.7578	126.984	125.992	111.442	111.276	72.7512
	Fecal TC	1.14197	1.57496	1.38533	1.24627	1.30948	1.23995	1.04716		1.33792	1.54019	1.87204	2.23866	1.39165	1.40551	2.00794	1.90681	2.12804	2.5073		1.92261	2.19757	2.02059		2.88656
	Fecal TG	1.80105	1.37477	1.19624	1.11244	1.11973	1.29461	1.22174	1.22174	1.38934	5.22221	5.57562	4.77407	4.49353	4.28242	5.24407	5.37888		5.85981	5.72136	5.96182	4.82508	5.85252	5.36795
	Fecal TBA	106.548	76.2584	92.294	81.6036	75.6644	69.369	83.6229	55.1151	72.8137	51.1952	61.7669	47.3942	94.1945	92.5246	81.1284		95.7387		30.4083	23.7565	11.8782	13.0661		56.1841
	Acetic acid	2.93911	2.97653	3.65395	3.05137	3.21653	2.17911	2.78169	2.47072	0.0939484	3.19201	2.72363	3.41266	2.54169	3.09911	2.71588	2.74814	2.48621	3.53008	2.69137	2.02814	3.1133	2.13911	2.4875	2.06685
	Propionic acid	1.30054	1.38722	1.52617	1.42528	1.53717	0.61542	1.3331	1.23818	0.544339	2.13471	1.63348	1.98796	1.58395	2.05125	2.01273	1.82287	1.79169	2.31723	1.48719	1.46013	2.20992	1.60275	1.74354	1.40785
	Isobutyric acid	0.909818	0.930182	0.903273	0.930909	0.928	0.893818	0.922909	0.917818	0.809455	0.866909	0.868364	0.852364	0.857455	0.858182	0.866182	0.865455	0.851636	0.893091	0.823273	0.84	0.875636	0.850909	0.865455	0.858909
	Butyric acid	1.58559	2.59914	1.79531	2.15994	2.13253	1.65635	2.18097	1.52376	0.338741	0.820653	0.67659	0.800255	0.781769	0.806629	0.742884	0.73141	0.692526	1.0342	0.777944	0.73906	0.809179	0.733323	0.638343	0.645992
	Isovaleric acid	0.505031	0.538365	0.489937	0.554717	0.532704	0.497484	0.522642	0.552201	0.400629	0.450314	0.454088	0.433333	0.451572	0.45283	0.459119	0.459119	0.447799	0.47673	0.425786	0.448428	0.476101	0.466038	0.443396	0.450314
	Pentanoic acid	0.45937	0.475743	0.437102	0.489497	0.482292	0.425968	0.450201	0.45937	0.312665	0.325108	0.353926	0.336897	0.3572	0.339517	0.359165	0.357855	0.322489	0.399771	0.345411	0.331003	0.348686	0.326418	0.321834	0.321179
OTU34	g_Ruminococcus]_torques_group	0	57	24	12	16	13	8	0	520	768	546	1338	644	976	746	485	201	593	472	300	426	153	598	1004
OTU67	g_Allobaculum	0	1	0	0	0	0	4	0	185	796	28	908	412	779	48	733	1513	2407	2487	1557	1	0	11	2
OTU102	g_Eubacterium]_nodatum_group	112	131	237	604	173	97	50	200	238	217	146	359	213	130	225	56	15	29	140	119	39	14	14	93
OTU137	g_Fusicatenibacter	0	0	0	0	0	6	0	1	87	368	205	861	300	179	97	279	168	352	1080	613	170	297	256	400
OTU152	g_Lactobacillus	198	5	25	237	16	52	263	413	919	2434	1184	1000	373	1249	243	451	168	741	470	305	261	2310	419	342
OTU181	g_Eubacterium]_nodatum_group	0	0	0	1	0	0	0	0	0	0	2	6	3	1	3	0	0	1	5	0	2	0	0	1
OTU198	g_Lachnoclostridium	14	58	26	40	99	6	3	4	785	1941	1485	5188	1188	2013	2877	1469	361	685	2454	671	1184	160	1155	1280
OTU230	g_Collinsella	77	11	21	139	52	28	15	36	908	1338	1245	605	1347	990	2353	1477	113	580	2928	535	545	2615	1047	1853
OTU242	g_unclassified_f_Ruminococcaceae	4	4	2	3	6	4	5	0	8	0	5	6	5	3	13	17	0	0	0	12	0	5	2	0
OTU281	g_Ruminococcaceae_NK4A214_group	12	45	1	287	562	100	339	1066	1841	793	865	1680	738	460	4546	2737	2	261	2359	353	1735	66	1173	1360
OTU295	g_Lactobacillus	1	0	1	1	1	0	4	0	0	1	5	1	1	2	0	2	8	16	15	4	1	5	15	1
OTU360	g_unclassified_f_Lachnospiraceae	8	20	9	87	40	0	1	21	441	266	1106	975	612	1418	3221	604	695	3207	312	702	259	221	2178	1183
OTU366	g_Gemella	1	7	28	1	25	10	42	25	79	16	4	8	6	6	4	6	0	9	5	2	3	0	1	1
OTU479	g_Eubacterium]_coprostanoligenes_group	0	1	2	0	6	3	0	2	0	0	0	6	2	2	4	6	0	0	2	0	0	0	1	0
OTU481	g_Eubacterium]_brachy_group	16	24	44	4	9	3	18	59	5	0	7	7	3	4	6	4	0	12	0	2	0	1	3	6
OTU492	g_Ruminococcaceae_UCG-005	580	165	9	533	494	539	244	634	0	0	0	0	0	7	0	0	6	0	0	7	0	0	1	0
OTU495	g_Candidatus_Saccharimonas	1668	1717	2527	650	786	1835	2021	687	0	0	0	0	0	1	0	0	0	0	0	0	0	0	0	0
OTU511	g_norank_o_Mollicutes_RF39	1016	14	31	36	1076	447	448	976	0	1	0	0	0	0	0	0	0	0	0	0	0	0	0	0
OTU624	g_Atopostipes	409	2137	691	36	1270	1069	156	235	84	265	305	9	185	222	128	323	56	124	50	34	0	6	13	3
OTU644	g_Lactobacillus	150	463	172	37	894	49	1781	176	0	0	1	2	0	16	6	3	0	4	30	31	0	9	0	0
OTU687	g_Allobaculum	8158	461	6506	1526	1574	2542	5808	2041	0	2	0	0	0	0	0	0	0	0	0	0	0	1	0	0
OTU707	g_Clostridium_sensu_stricto_1	745	940	1862	266	699	384	925	1575	0	0	0	2	1	23	4	4	0	0	0	2	0	3	2	1
OTU713	g_Turicibacter	509	1163	1385	368	929	706	1339	1867	0	1	1	4	1	3	0	4	0	4	0	3	0	4	1	0
OTU829	g_Ruminococcaceae_UCG-014	298	775	1223	143	190	144	536	199	0	1	0	0	0	0	0	0	0	0	0	0	0	0	0	0
OTU909	g_norank_f_Desulfovibrionaceae	0	0	0	0	0	0	0	0	4	17	1	5	4	6	5	24	0	0	5	0	0	0	0	4
OTU924	g_Ruminococcaceae_UCG-005	808	1089	339	2076	3362	2689	347	1428	9	0	1	0	0	54	0	0	998	36	0	842	1	0	12	0
OTU938	g_Nosocomiicoccus	292	682	490	43	323	354	397	406	0	0	1	5	21	44	29	23	352	185	211	112	18	87	147	41
OTU942	g_Lactobacillus	704	592	1891	1390	1262	366	1569	88	1	23	2	90	38	88	19	8	9	38	301	528	1	13	0	3
OTU960	g_unclassified_f_Ruminococcaceae	0	0	0	0	3	1	8	13	0	0	0	0	0	0	0	0	0	0	0	0	0	1	1	1
