# Supplementary material for: The Effect of Simvastatin on Gut Microbiota and Lipid Metabolism in Hyperlipidemic Rats Induced by a High-Fat Diet
Source: Front Pharmacol. 2020 Apr 29;11:522. doi: 10.3389/fphar.2020.00522 (PMC7201051; doi:10.3389/fphar.2020.00522)
Supplement: Supplementary file 3 [file DataSheet_3.xlsx]

## Sheet: HFD_Sim VS HFD
id	met	SIM1_2pos.SIM1_2	SIM2_1pos.SIM2_1	SIM2_5pos.SIM2_5	SIM1_5pos.SIM1_5	SIM2_2pos.SIM2_2	SIM1_3pos.SIM1_3	SIM1_1pos.SIM1_1	SIM1_4pos.SIM1_4	HFD2_2pos.HFD2_2	HFD2_1pos.HFD2_1	HFD2_4pos.HFD2_4	HFD2_5pos.HFD2_5	HFD1_3pos.HFD1_3	HFD2_3pos.HFD2_3	HFD1_1pos.HFD1_1	HFD1_2pos.HFD1_2
10039	Glycochenodeoxycholate	0.0545388	0.0296145	0.0218642	0.0214682	0.0341442	0.0896541	0.0759902	0.0547529	0.1002	0.115433	0.0556017	0.0477605	0.031017	0.128991	0.062401	0.132946
10603	Glycodeoxycholic acid	0.222223	0.137111	0.087747	0.0814988	0.133697	0.36979	0.204705	0.228967	0.411984	0.484772	0.235682	0.175731	0.12728	0.469594	0.219462	0.625005
1557	3-Methylxanthine	0.00448758	0.00396835	0.00339162	0.00459282	0.00546158	0.00484602	0.00515332	0.0065435	0.00242804	0.00262278	0.00152145	0.00359062	0.00267624	0.00227264	0.00405576	0.0036368
1567	L-Phenylalanine	0.00319628	0.00258376	0.00311509	0.0045623	0.00518265	0.0045871	0.00471758	0.00466911	0.00251073	0.00362168	0.00249771	0.00411809	0.00217061	0.00316535	0.00367625	0.00319812
4263	Securinine	0.00550569	0.00445811	0.00503534	0.00649198	0.0063708	0.00497298	0.00536318	0.00878745	0.00427273	0.00457495	0.00455157	0.00477679	0.00469607	0.00357081	0.00395243	0.00422362
2293	2-Phenylacetamide	0.0223178	0.0117975	0.0134102	0.0220758	0.0301658	0.0209007	0.0266838	0.0238636	0.01382	0.0121472	0.0206729	0.0190015	0.0180839	0.0162534	0.0163535	0.0118121
1601	D-Xylose	0.00444492	0.0019633	0.00131545	0.00304242	0.00658983	0.00367302	0.00506903	0.00473274	0.00178574	0.00163473	0.00138859	0.00103455	0.00240343	0.00225056	0.00202822	0.00124925
2711	Ribitol	0.0114632	0.00287903	0.00365815	0.0104327	0.0160443	0.0137223	0.0131703	0.0115811	0.00682742	0.00389124	0.00470313	0.00285558	0.00674122	0.00288972	0.00457013	0.00400189
544	Methylmalonic acid	0.301288	0.256615	0.218785	0.233543	0.311235	0.281945	0.241582	0.292506	0.224991	0.235727	0.246095	0.244938	0.228352	0.167302	0.159245	0.217737
891	Hypoxanthine	15.1699	13.3011	12.4178	11.6483	16.4392	16.6044	14.088	15.3312	13.3786	13.3717	12.2814	12.9752	10.9663	9.0739	8.57936	11.2455
4180	L-Pipecolic acid	0.00304408	0.0028154	0.00327822	0.00335261	0.00450136	0.00237693	0.00366056	0.00275615	0.00186973	0.00314834	0.00187047	0.0032332	0.00170022	0.00187861	0.00089661	0.00230298
1271	Xanthine	0.181998	0.170237	0.160826	0.196906	0.248264	0.185874	0.201484	0.213106	0.184232	0.162374	0.184032	0.188797	0.130509	0.158944	0.123346	0.124845
6274	20-Hydroxyarachidonic acid	0.0479523	0.0463186	0.0352443	0.053529	0.0521557	0.0482296	0.0469795	0.0423245	0.037859	0.0486735	0.0425728	0.0443105	0.0288107	0.0339399	0.029357	0.0287055
2902	Pantothenate	0.22927	0.145445	0.14739	0.130754	0.283705	0.248368	0.23918	0.248718	0.196461	0.164033	0.139728	0.122577	0.129614	0.112301	0.0832532	0.0967947
1207	L-Methionine	0.186017	0.121348	0.139446	0.1296	0.192771	0.164324	0.18411	0.181289	0.163296	0.1351	0.122426	0.11915	0.134564	0.110346	0.103062	0.103647
1235	Methoxyacetic acid	0.0109738	0.00699549	0.00823918	0.00680057	0.0116948	0.0105757	0.0113873	0.011163	0.00945856	0.00823032	0.00605955	0.00767773	0.00801564	0.00570912	0.00671303	0.00525438
2094	DL-Indole-3-lactic acid	0.246153	0.162609	0.200904	0.187729	0.323346	0.240937	0.228717	0.239354	0.238455	0.196351	0.177266	0.169562	0.201102	0.186306	0.145547	0.138584
1088	DL-O-tyrosine	0.0252648	0.0167183	0.0180188	0.0185065	0.0289039	0.0219841	0.0252932	0.0237515	0.0238385	0.0173992	0.0162821	0.017906	0.0177868	0.0170926	0.0127912	0.013034
566	Tyramine	1.80366	1.04912	1.28646	1.28628	2.08454	1.40062	1.7441	1.50212	1.43962	1.21513	1.09841	1.19882	1.37049	1.0624	0.942981	0.989552
1185	trans-cinnamate	0.0272959	0.0178351	0.020771	0.0181979	0.0332022	0.0211438	0.0287536	0.0258965	0.0246382	0.0201877	0.0169467	0.020849	0.0204329	0.0180412	0.0159216	0.0161788
3175	Ile-Pro	0.0276998	0.0141998	0.016263	0.0166508	0.0254416	0.0163552	0.0218708	0.0262047	0.0154927	0.0138094	0.0104842	0.011831	0.0128736	0.0149294	0.0113237	0.0117031
4310	Phe-Pro	0.0095116	0.00532645	0.00750204	0.00872465	0.00986905	0.0084196	0.00937712	0.00918702	0.00858433	0.00810137	0.00564115	0.00562397	0.00681927	0.00749974	0.00549812	0.00573311
483	D-Ornithine	0.00513563	0.00515521	0.00571678	0.00522586	0.00750729	0.00553411	0.0064656	0.00638468	0.00364716	0.00347183	0.00396595	0.00393588	0.00386221	0.00420276	0.00338201	0.00342196
2746	Pro-Val	0.00729457	0.00597152	0.006837	0.00828814	0.0152419	0.00725306	0.00923087	0.00720747	0.006993	0.00620926	0.00394773	0.00271319	0.00502927	0.0041268	0.00368555	0.0041829
3657	Cytidine	1.05036	1.13029	1.0458	1.22811	1.62472	1.12021	1.20026	1.19917	1.04419	0.979755	1.01436	0.881062	0.824543	0.897625	0.683133	0.929434
1092	Pyridostigmine cation	0.116265	0.106083	0.109006	0.145749	0.152224	0.133727	0.119121	0.138552	0.119745	0.109947	0.110886	0.0902698	0.111529	0.0996775	0.0963789	0.0997672
3306	Gly-Pro	0.0449087	0.0389697	0.0362274	0.0518396	0.0555332	0.043994	0.0483386	0.0511904	0.0395782	0.0385938	0.0300565	0.0257862	0.0357172	0.0280978	0.0376601	0.0371061
40	Pyrrolidine	0.335673	0.238583	0.261959	0.344055	0.345176	0.31179	0.347488	0.321327	0.284027	0.25395	0.238964	0.227784	0.250636	0.209616	0.206636	0.208932
343	L-Serine	0.0375605	0.0330649	0.0318393	0.0443106	0.0472069	0.0435687	0.0494029	0.0402433	0.0377492	0.0312462	0.0322797	0.0279949	0.0302982	0.0286706	0.0259381	0.0264235
3654	b-D-Galactopyranose	0.019859	0.0143617	0.01835	0.0188374	0.025205	0.0260383	0.0248456	0.0263288	0.0158195	0.0140445	0.0113262	0.0111561	0.016197	0.0101116	0.0110125	0.010754
6010	Arbutin	0.00592143	0.00353438	0.00402406	0.00676346	0.00999324	0.00866429	0.00737955	0.00937266	0.00428783	0.00520908	0.00372822	0.00235308	0.00358943	0.00302412	0.00279867	0.00276183
546	Phenylacetic acid	0.0351048	0.0265967	0.0259447	0.0372104	0.0494499	0.0456034	0.042134	0.0412166	0.0329425	0.0280056	0.0289918	0.0264641	0.0281954	0.025985	0.024613	0.0242714
1111	Coumarin	0.0314471	0.0254034	0.0266412	0.0338887	0.0456885	0.0419162	0.0408204	0.0390932	0.0308683	0.0263393	0.025972	0.0231319	0.0255084	0.0240269	0.0226484	0.0220872
1540	trans-2-Hydroxycinnamic acid	0.181604	0.150935	0.146939	0.197291	0.257101	0.25007	0.241246	0.235752	0.187927	0.158248	0.163108	0.139683	0.155336	0.144837	0.1323	0.133644
1936	L-Tyrosine	0.297404	0.247342	0.241723	0.31029	0.433767	0.417861	0.39449	0.39448	0.306754	0.260183	0.25697	0.21907	0.251246	0.238153	0.21099	0.214547
2197	N-Benzyloxycarbonylglycine	0.00605125	0.00932025	0.00646847	0.00661713	0.00930975	0.00965801	0.011012	0.00846831	0.00697144	0.00721127	0.00766608	0.00776495	0.00417952	0.00525822	0.00550368	0.00438318
2618	L-Kynurenine	0.00781561	0.0125727	0.00814602	0.0084034	0.0100634	0.0127741	0.0146458	0.0102939	0.00975032	0.00898813	0.00878094	0.00953718	0.00444236	0.00726445	0.00714209	0.0053041
4258	Nname,Cinoxacin	0.00865352	0.011347	0.00743384	0.00840421	0.0121895	0.0102278	0.011774	0.0110338	0.00770919	0.00756832	0.00681363	0.0121776	0.00797312	0.00731078	0.00768985	0.00534582
8719	Loxapine	0.006436	0.00675932	0.0046891	0.00352761	0.00711388	0.00761283	0.00766517	0.00695904	0.00592614	0.00490247	0.00404137	0.00635591	0.00468124	0.00541529	0.00412709	0.00401641
1594	DL-a-Hydroxybutyric acid	0.0475346	0.0499492	0.0426575	0.0401918	0.0538639	0.0532585	0.0691799	0.0612381	0.0394578	0.0410853	0.0313934	0.0562971	0.0391558	0.0356277	0.0354828	0.0274994
2958	N-Acetyl-D-glucosamine	0.404064	0.323154	0.281553	0.184404	0.372541	0.386215	0.49374	0.445324	0.285629	0.251456	0.209976	0.334805	0.262089	0.248292	0.225301	0.170892
9684	Pro-Ser	0.143296	0.123168	0.128583	0.168707	0.219187	0.257817	0.197431	0.204411	0.206397	0.149158	0.129634	0.0877084	0.139424	0.118828	0.111854	0.105
1648	Nicotinyl	0.00656762	0.00333511	0.00562779	0.00125663	0.0146033	0.0206531	0.0135325	0.00946087	0.00437396	0.00373341	0.00194118	0.000342728	0.00351688	0.00114607	0.00213636	0.00299444
1994	3-(2-Hydroxyphenyl)propionic acid	0.00423333	0.00445653	0.00418146	0.00256107	0.00744827	0.00704619	0.00579488	0.00728734	0.00430711	0.00369156	0.0036622	0.00143717	0.00397735	0.00192618	0.00114867	0.00200918
1369	N2-Acetyl-L-ornithine	0.0248361	0.00900052	0.0122308	0.0131669	0.0138426	0.0307091	0.0341577	0.0318414	0.0143021	0.0162023	0.0150307	0.0121268	0.00798253	0.00585148	0.00907174	0.00638764
1597	(R)-3-Hydroxybutyric acid	0.00847273	0.00272284	0.00512104	0.00510332	0.00645674	0.00931644	0.0122966	0.0121319	0.00490321	0.0052185	0.00523171	0.00369115	0.00481339	0.00485302	0.00377139	0.00176263
1792	N-Carboxyethyl-.gamma.-aminobutyric acid	0.00517835	0.00158445	0.000805367	0.00217336	0.00348164	0.00718262	0.00693571	0.0063035	0.00205707	0.00222655	0.00170267	0.00178925	0.00214271	0.0022669	0.00150233	0.00133139
6072	Deoxyinosine	0.00562833	0.00236801	0.00342347	0.00502101	0.00543061	0.0113705	0.00937463	0.00853148	0.00402961	0.00514318	0.00409276	0.00234646	0.00381461	0.00223801	0.00163268	0.0022476
3935	Propazine	0.0286691	0.0116967	0.0139874	0.0119696	0.0263358	0.0477634	0.0306143	0.033516	0.0119107	0.0173247	0.0151009	0.0111664	0.015927	0.0114282	0.0113481	0.0102157
10315	5-Hydroxytryptophan	0.00486697	0.00219774	0.00309673	0.00295403	0.00528511	0.010308	0.00757871	0.00812386	0.00292128	0.00301679	0.00276498	0.00221081	0.00310564	0.00157581	0.00278016	0.00169065
8431	Desoxypeganine	0.0127423	0.014533	0.0108452	0.0136009	0.0195479	0.0211886	0.0200818	0.0235199	0.011424	0.0131589	0.0130357	0.0146126	0.0104971	0.00960446	0.0106864	0.0110131
1942	2-Butoxyethanol	0.0458368	0.0171326	0.0117126	0.00215049	0.0412375	0.0500956	0.0516937	0.0519863	0.0246522	0.0236112	0.0200612	0.00874274	0.0133261	0.0129516	0.013807	0.0126826
4943	2'-O-methylinosine	0.00605206	0.00447428	0.00294931	0.00108088	0.00703251	0.00893047	0.00711132	0.00817433	0.00237786	0.00430881	0.00293583	0.00209493	0.00420092	0.00218099	0.00321034	0.00356637
565	L-Threonine	0.0497109	0.0507182	0.0499861	0.119761	0.080916	0.108902	0.066487	0.0990244	0.0356689	0.0436582	0.0551288	0.0579202	0.0472359	0.0354859	0.0254075	0.0358364
4662	5'-Deoxyadenosine	0.0817517	0.0613491	0.108878	0.184389	0.155751	0.181796	0.139037	0.151829	0.0873229	0.088303	0.10203	0.0616499	0.0795254	0.0591846	0.0680634	0.0731078
3058	Fraxetin	0.0158053	0.0125159	0.0316598	0.0240491	0.029898	0.0376638	0.0286043	0.0281499	0.0157713	0.0166	0.0196286	0.0136503	0.0191713	0.0122401	0.0129346	0.0150215
3603	D-Mannose-6-phosphate	0.00636622	0.00685253	0.00938596	0.0108563	0.0112819	0.0138737	0.0100801	0.0105037	0.00624039	0.00594989	0.00840343	0.00645924	0.00889561	0.00825734	0.00637928	0.0100536
5014	Xanthosine	0.0289461	0.0413751	0.0696872	0.0791948	0.120017	0.089063	0.0661307	0.0667383	0.0473908	0.0472073	0.0449781	0.0258369	0.0616929	0.0426509	0.0500567	0.0318251
6229	His-Thr	0.00172207	0.00294962	0.00261257	0.00322669	0.0048576	0.0045631	0.00252334	0.00212783	0.00254651	0.00198565	0.00229297	0.00189768	0.00253746	0.0010627	0.0027227	0.00110286
1819	Allantoate/Allantoic acid	0.00178943	0.00204053	0.00154694	0.00289113	0.00301599	0.00316972	0.00292527	0.0025943	0.00193991	0.00190131	0.0019386	0.00206833	0.00208361	0.00198986	0.00183127	0.00184409
1889	L-homoserine	0.489817	0.356401	0.260008	0.65314	0.820158	0.717923	0.647046	0.607546	0.535811	0.367622	0.295427	0.479349	0.351209	0.328133	0.44287	0.313768
3659	Etomidate	0.0216246	0.0290534	0.0232362	0.0607308	0.0901182	0.0814562	0.0495984	0.0615815	0.0360777	0.0404309	0.0378377	0.0193582	0.0267507	0.0199652	0.0236373	0.0285763
7284	SANGUINARINE	0.0207765	0.0238967	0.0167112	0.0400451	0.0568421	0.0554714	0.0354401	0.0443096	0.029439	0.0303058	0.02425	0.0152326	0.0225612	0.0147596	0.0184107	0.0190056
1888	3-Hydorxy-3-methylglutaric acid	0.0190608	0.0187704	0.0189175	0.0394388	0.0467062	0.0468321	0.0329042	0.0384614	0.0219723	0.0302829	0.0266178	0.0186742	0.019408	0.0169132	0.0191315	0.0244778
5628	Thymidine	0.00421477	0.00478046	0.00465568	0.01258	0.0148249	0.0143548	0.00868921	0.0100636	0.00600183	0.00683463	0.00674478	0.00411002	0.00422442	0.00412639	0.00430262	0.00550225
5314	Ile-Tyr	0.539273	0.559252	0.374771	1.24453	1.72579	1.33764	0.825476	1.12818	0.617923	0.84081	0.765813	0.374866	0.353042	0.330119	0.669735	0.53565
5393	Ile-Thr	0.00936251	0.0146657	0.00853663	0.0297879	0.0469633	0.0384588	0.0316537	0.031427	0.0168561	0.0265061	0.0153032	0.00617945	0.00944504	0.00789074	0.0165008	0.0135566
4465	Adenosine	0.0759743	0.0549255	0.0786269	0.118613	0.20369	0.158662	0.115875	0.127837	0.0505184	0.0813689	0.0986779	0.0752455	0.0728257	0.0653685	0.0695956	0.0562753
5952	N-Methyl-D-aspartic acid	0.00480392	0.00324096	0.00312797	0.0053415	0.011659	0.00796029	0.00531494	0.00637675	0.00441205	0.00407822	0.00311909	0.0016212	0.00344148	0.00214956	0.00279037	0.00304489
6540	Phe-Thr	0.00338635	0.00504842	0.00469554	0.00902409	0.0171203	0.011017	0.00764363	0.00956362	0.00547574	0.00561353	0.00547836	0.00227421	0.0046938	0.00288993	0.00379263	0.00480215
2295	Ethyl 3-hydroxybutyrate	0.00192229	0.00172118	0.000622295	0.00274925	0.00185387	0.00279285	0.00294982	0.00174875	0.00114709	0.000936978	0.0016531	0.00139862	0.000748146	0.00103759	0.000561698	0.0020079
1097	(3-Carboxypropyl)trimethylammonium cation	1.08067	1.05546	1.13323	1.46326	1.49402	1.66842	1.45958	1.07178	0.896303	1.32421	1.04819	1.15319	0.988278	1.2109	0.919003	1.1254
7323	Ethisterone	0.0421761	0.071224	0.0426178	0.0765819	0.0987099	0.134451	0.0920541	0.0719926	0.0496029	0.0754587	0.0608532	0.03844	0.0440176	0.0416515	0.0477489	0.056293
2435	3-Methoxy-4-hydroxyphenylethyleneglycol	0.019456	0.0134074	0.0143315	0.0235243	0.0187067	0.0215176	0.0209281	0.0215126	0.022445	0.0183227	0.0150059	0.0136635	0.013848	0.0103386	0.0135643	0.0107178
5715	Osthol	0.00549203	0.00369443	0.00331475	0.00497545	0.00423791	0.0102094	0.0053275	0.00958584	0.00597185	0.00411166	0.00421186	0.00311482	0.00279994	0.00224058	0.00249354	0.00319419
2074	Val-Ser	0.0128507	0.00809141	0.00848171	0.0204994	0.0112231	0.0253587	0.0205955	0.0208177	0.0111771	0.0145447	0.0147278	0.0104031	0.00724758	0.00551231	0.00928526	0.00786319
6007	(S)-2-Hydroxyglutarate	0.00179626	0.0015097	0.00114686	0.00286856	0.00244071	0.00452692	0.00443329	0.00460804	0.00260498	0.00260508	0.00106492	0.00114524	0.00119202	0.00138405	0.00170614	0.00109272
2127	Val-Ala	0.0114136	0.00690078	0.0117032	0.0102112	0.0118582	0.0117054	0.0205556	0.0129842	0.00807723	0.00850646	0.00737886	0.010244	0.00698366	0.00439586	0.00870517	0.0053436
5303	Tulobuterol	0.00577304	0.00677134	0.0208639	0.0130487	0.0050514	0.0174918	0.0194865	0.0184599	0.00641734	0.00973679	0.0109904	0.00673528	0.00647012	0.00486843	0.00394414	0.0049609
2072	Pro-Ala	0.0210382	0.0145191	0.0215486	0.0366435	0.0350476	0.0272052	0.0315379	0.0242422	0.028262	0.0188924	0.016148	0.00512564	0.0234499	0.0126705	0.0203507	0.013105
797	L-Asparagine	0.0219739	0.0217541	0.0254508	0.0454833	0.0437538	0.0316911	0.0297116	0.024957	0.0260526	0.0229782	0.0240924	0.018219	0.0233412	0.0202544	0.0207657	0.0206416
5637	Ser-Arg	0.00178131	0.00185622	0.00253387	0.00515804	0.00417076	0.00307606	0.00341767	0.00241839	0.0020759	0.002514	0.00152126	0.00147608	0.00255472	0.00127015	0.00206688	0.00179848
5020	His-Glu	0.0173133	0.0127962	0.0184482	0.0318698	0.0236124	0.0198761	0.021109	0.0186769	0.0186201	0.0159811	0.0137411	0.0106445	0.0172134	0.0123468	0.0158079	0.00977451
2710	Gly-His	0.00661237	0.0048966	0.0051791	0.012838	0.0105891	0.00988153	0.00903589	0.00791457	0.00712488	0.00671754	0.00445017	0.0038837	0.00580557	0.00466634	0.00596089	0.00471778
4508	Leu-His	0.00414894	0.00328515	0.00386606	0.0104787	0.00847834	0.00653682	0.00607247	0.00607449	0.00440855	0.00451062	0.00290328	0.00254576	0.00468464	0.00277588	0.0039565	0.00196114
2810	N-.alpha.-Acetyl-L-arginine	0.0439493	0.0400265	0.0380774	0.0744267	0.0697864	0.0587876	0.0634025	0.0407363	0.0560893	0.0472452	0.0340407	0.0327838	0.0337292	0.0357674	0.0299346	0.0326737
4218	Ile-Ser	0.00462705	0.00456815	0.00296257	0.0106178	0.0113057	0.00742891	0.00780839	0.00578967	0.00644551	0.00500809	0.00400143	0.00469338	0.00342333	0.00407546	0.00366579	0.00349259
782	L-Leucine	0.336283	0.27877	0.323061	0.492458	0.43456	0.396138	0.455698	0.383278	0.305113	0.370726	0.319855	0.299793	0.339846	0.274044	0.239186	0.329846
396	Imidazole	0.819982	0.737413	0.695739	1.32643	1.15069	1.03997	1.05282	0.958333	0.87091	0.875785	0.791161	0.712135	0.80267	0.691887	0.706934	0.783352
1338	L-Histidine	1.35414	1.1804	1.10701	2.02583	1.8842	1.69735	1.76355	1.56209	1.44966	1.38039	1.28729	1.09968	1.26833	1.15574	1.1542	1.24459
4377	Thiamine	0.391941	0.304238	0.333924	0.717746	0.573992	0.512468	0.506106	0.465336	0.382731	0.436689	0.398345	0.31948	0.343881	0.267528	0.293721	0.352526
4406	Diethylcarbamazine	0.0558998	0.0438827	0.0471335	0.090462	0.0750309	0.0771998	0.0717583	0.0655659	0.0555914	0.0624093	0.0552473	0.044961	0.0489217	0.0382012	0.0404005	0.0494033
1095	4-Guanidinobutyric acid	1.40663	0.952655	0.998872	2.11158	1.82106	1.09434	1.60403	1.11302	1.03153	0.86898	0.842104	0.818569	0.999135	0.757695	0.744307	0.64306
2484	2-Amino-1-phenylethanol	0.0202688	0.0125228	0.0161691	0.0291326	0.025359	0.0178244	0.0204549	0.0181932	0.0158703	0.0154724	0.0152024	0.0132886	0.0164712	0.0141682	0.0120295	0.0123115
1413	Phenelzine	0.0561818	0.0368585	0.0458784	0.0727669	0.0792586	0.0529891	0.0567132	0.0592436	0.0514375	0.0545371	0.0469198	0.0432079	0.0440529	0.0405903	0.0332446	0.0400244
6304	Arachidonic Acid (peroxide free)	0.0996132	0.0534053	0.0791322	0.129086	0.123055	0.0679885	0.0806357	0.0715139	0.0784361	0.0770479	0.0777733	0.0722472	0.0552742	0.0557601	0.0447442	0.05625
5112	N-Phenylacetamide	0.0262321	0.0202177	0.0186586	0.0390108	0.0451363	0.0142097	0.0136207	0.0165307	0.0244297	0.0100745	0.00898662	0.0186969	0.0107146	0.0143835	0.0119745	0.0100405
496	L-Proline	0.293639	0.316065	0.377282	0.575496	0.500295	0.35549	0.319035	0.373219	0.313106	0.242975	0.227551	0.166806	0.288251	0.212982	0.21023	0.248698
6981	1-Stearoyl-rac-glycerol	0.0337125	0.0295797	0.0353697	0.0739883	0.0535655	0.0303938	0.0389162	0.0443354	0.0389045	0.0262995	0.0235275	0.0289607	0.0284242	0.0254657	0.0225133	0.0203728
430	Cytosine	0.453932	0.499477	0.495142	0.824437	0.735786	0.589436	0.585103	0.594258	0.441104	0.489112	0.514495	0.473282	0.476168	0.48888	0.411691	0.52692
2332	N-Acetyl-L-Histidine	0.0242854	0.0382067	0.0353431	0.0524251	0.0528991	0.0389606	0.0348663	0.0341659	0.0273525	0.0247344	0.0252223	0.0247184	0.0258289	0.0255643	0.0233965	0.0364036
2124	N.alpha.-Acetyl-L-lysine	0.0773111	0.114127	0.0959411	0.164263	0.160713	0.10554	0.107244	0.0861125	0.0794731	0.109394	0.0795708	0.0697727	0.0585459	0.0763548	0.09577	0.102995
3749	2-Methylbutyroylcarnitine	0.0134144	0.0202123	0.0175271	0.0251553	0.03221	0.0213073	0.0165929	0.0147081	0.0189961	0.0154946	0.0144012	0.0137286	0.0128228	0.0134693	0.0150087	0.0153373
2407	Sarcosine	0.0330731	0.0277315	0.0301141	0.0395747	0.0394044	0.0271927	0.0356279	0.0328985	0.0409465	0.0230152	0.0181795	0.0208682	0.0160215	0.0176949	0.0145396	0.0149749
9990	Kinetin	0.00950758	0.00845095	0.010812	0.0120664	0.00788523	0.00800018	0.00845846	0.0109459	0.00902784	0.0062122	0.00621593	0.00502358	0.0038509	0.00399724	0.00274071	0.00382833
1554	DL-Methionine sulfoxide	0.0273456	0.0313768	0.0403849	0.042919	0.0395066	0.0263644	0.0252475	0.0292353	0.0286823	0.0211491	0.0205515	0.0243696	0.0197435	0.0218116	0.0174952	0.0174026
5455	2-Methylguanosine	0.0184696	0.0217045	0.0200714	0.0220428	0.0221481	0.0135389	0.0169389	0.0185331	0.0167464	0.0106601	0.0176717	0.0125752	0.0111079	0.0127371	0.00768774	0.0105861
4407	Pro-Trp	0.182802	0.358416	0.405944	0.458692	0.464278	0.576753	0.335978	0.587509	0.257362	0.421642	0.312649	0.24887	0.14135	0.156236	0.181004	0.175961
10929	Pro-Asp	0.0282912	0.0478138	0.0446883	0.0347945	0.0597665	0.0632959	0.0473257	0.0665243	0.0491988	0.0388776	0.0595723	0.0304452	0.0176651	0.0204559	0.0216474	0.0182304
3469	Tyr-Gly	0.00446062	0.0082868	0.00502463	0.00459929	0.00664756	0.00472407	0.00515211	0.00683353	0.00590369	0.00545905	0.00627833	0.00415381	0.000500604	0.00208946	0.00217386	0.00281425
10504	His-Gly	0.00145197	0.00257054	0.00181622	0.0013979	0.00309321	0.00244239	0.00181838	0.00212889	0.00242311	0.000841997	0.00148044	0.000810462	0.00106751	0.000634532	0.000718388	0.000607051
979	Gaboxadol	0.229642	0.321616	0.0726567	0.136377	0.0918709	0.285526	0.182732	0.210455	0.101018	0.0812676	0.147254	0.0603754	0.0550152	0.113109	0.0869148	0.138139
7391	Ajmalicine	0.0151295	0.0120075	0.0119448	0.0138296	0.009274	0.0142732	0.00891372	0.0153836	0.00933408	0.0107657	0.0084094	0.00600517	0.0110293	0.00887415	0.0101079	0.00788765
7466	Desoxycorticosterone acetate	0.0208715	0.0144657	0.0132915	0.027768	0.0128127	0.0234785	0.01221	0.0208619	0.0123819	0.0148457	0.0143241	0.00828925	0.0132875	0.0100414	0.0113316	0.0126063
1675	.beta.-Homoproline	0.0132048	0.00351795	0.00343698	0.00775087	0.00432598	0.00369162	0.00754635	0.00764786	0.0031089	0.00414225	0.00340967	0.00270182	0.00266048	0.00213161	0.00242693	0.00255858
5024	Nordihydroguaiaretic Acid	0.00376678	0.00160492	0.0035229	0.00524107	0.00176862	0.00177004	0.00347925	0.00429011	0.00242974	0.00196403	0.00179802	0.00251386	0.00109909	0.00218543	0.00122707	0.00201448
7150	Tyr-Phe	0.00374702	0.00359454	0.00266966	0.00548331	0.0052183	0.00486243	0.00487785	0.0045525	0.00311804	0.00375928	0.00202409	0.00292058	0.00166541	0.00305782	0.00207219	0.00168656
10094	3,4-Dimethoxycinnamic acid	0.00459149	0.00318357	0.00298897	0.00563967	0.00449341	0.00462056	0.00371371	0.00397591	0.00289908	0.00334185	0.00253121	0.00240159	0.00159919	0.00432283	0.00215207	0.00229178
8220	(-)-Riboflavin	0.0658481	0.0626658	0.0586112	0.0766218	0.0578423	0.0691645	0.0760558	0.0635168	0.0536651	0.058151	0.0583783	0.0580445	0.0469338	0.0551763	0.0402239	0.0462485
10174	Sparfloxacin	0.0029348	0.00266566	0.00306192	0.00622418	0.00288427	0.00381593	0.0040387	0.00369826	0.00181281	0.00256967	0.00275567	0.00288231	0.00178962	0.00308545	0.00211125	0.00241559
645	3-Methylhistamine	0.00476311	0.00297978	0.00304261	0.00807241	0.00374724	0.0035661	0.00449543	0.00344149	0.00242927	0.00221077	0.00390018	0.00258128	0.00325376	0.0016803	0.00197665	0.00292267
9166	Erucic acid	0.00801097	0.00485303	0.00586439	0.0170793	0.0105274	0.00698852	0.00863235	0.0054707	0.00328357	0.0024871	0.0071032	0.0080374	0.00417324	0.00264713	0.00633791	0.00356915
3669	Myristoleic acid	0.00804922	0.010606	0.00643323	0.0202317	0.0123974	0.0108431	0.0104226	0.0117933	0.00706425	0.0113646	0.00961198	0.000839735	0.00583831	0.0054812	0.00685877	0.00672829
7240	Stearic acid	0.0694512	0.0586981	0.0444402	0.108914	0.087482	0.0683196	0.0904864	0.0821025	0.0491682	0.0806964	0.0751186	0.0461117	0.0492465	0.058164	0.0430538	0.0498051
751	Glutaconic acid	0.0106416	0.00738386	0.00613595	0.012932	0.00971616	0.0101156	0.00991371	0.00949053	0.00912971	0.00780827	0.00808416	0.00628358	0.00744542	0.00621607	0.00649033	0.00714319
7728	N-Oleoylglycine	0.0350006	0.021291	0.0164051	0.050698	0.0256279	0.0304691	0.0277169	0.0253983	0.0245307	0.0268281	0.0156796	0.0138698	0.0156258	0.0207551	0.018778	0.0192161
3468	Biopterin	0.0178955	0.0185147	0.0169197	0.0340378	0.0230926	0.0198332	0.0208317	0.0215882	0.0168783	0.0198322	0.0150775	0.0171804	0.0144394	0.0129545	0.00974846	0.01406
893	Anthranilic acid	0.0089351	0.00584545	0.00546259	0.0151927	0.0083836	0.0104128	0.00770425	0.00720658	0.00569565	0.00706499	0.00596419	0.00661693	0.00589061	0.00486688	0.00534035	0.00647227
1958	4-Hydroxybenzaldehyde	0.055555	0.0521661	0.0459196	0.0964274	0.0537681	0.0731657	0.0484404	0.0593281	0.0513468	0.0573063	0.0451741	0.0474444	0.0438756	0.0366446	0.038642	0.0399982
